# Supplementary material for: Human ectoparasites and the spread of plague in Europe during the Second Pandemic
Source: PubMed Central journal article supplement — Proc Natl Acad Sci U S A. 2018 Jan 16;115(6):1304–9. doi: 10.1073/pnas.1715640115 (PMC5819418; doi:10.1073/pnas.1715640115), 2018-01-16
Supplement: pnas.201715640SI.pdf [file pnas.201715640SI.pdf]

# Supporting Information

Dean et al. 10.1073/pnas.1715640115

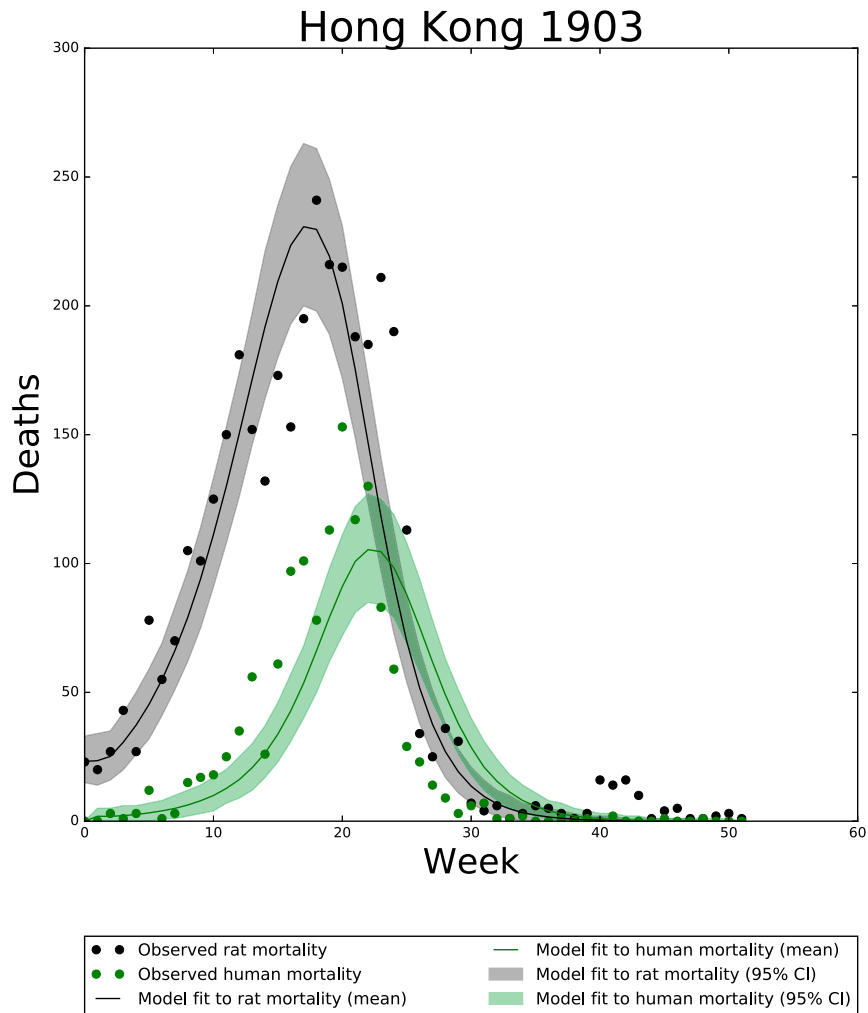

**Fig. S1.** Fit of the rat–flea model to observed rodent and human mortality during the 1903 plague outbreak in Hong Kong. The observed rat mortality (black dots), the observed human mortality (green dots), and fit (mean and 95% credible interval) of the rat model for plague transmission to both the rat (black) and human (green) mortality. The mortality peak for humans from the model is delayed compared with the observed data. However, the model captures the dynamics of the rat mortality and the relationship between the epizootic and the epidemic well by showing the characteristic higher rat mortality and the delay in the onset of the epidemic in humans.







**Table S5. Comparison of transmission models and estimates for the basic reproduction number for different plague models and Third Pandemic outbreaks**

| Location         | Model | BIC   | $\Delta$ BIC | $R_0$             |
|------------------|-------|-------|--------------|-------------------|
| Sydney (1900)    | EP    | 235   | 46           | 0.86 [0.86, 0.87] |
|                  | PP    | 196   | <b>7</b>     | 1.05 [1.05, 1.05] |
|                  | RP    | 189   | <b>0</b>     | 1.36 [1.36, 1.36] |
| Hong Kong (1903) | EP    | 611   | 107          | 1.52 [1.52, 1.52] |
|                  | PP    | 900   | 396          | 1.06 [1.06, 1.06] |
|                  | RP    | 504   | <b>0</b>     | 1.41 [1.41, 1.41] |
| Harbin (1910)    | EP    | 851   | 31           | 2.98 [2.98, 2.98] |
|                  | PP    | 820   | <b>0</b>     | 1.21 [1.21, 1.21] |
|                  | RP    | 1,606 | 786          | 3.62 [3.62, 3.62] |

The models are designated as human ectoparasite (EP), primary pneumonic plague (PP), and rat and rat–flea (RP). Values in bold represent the best-fitting models that were within 10 points of the lowest BIC. The  $R_0$  (mean [95% confidence interval]) was estimated for each model using the next-generation matrix.

**Table S6. Comparison of transmission models with different levels of underreporting**

| Location         | Model | BIC                |                    |                    |
|------------------|-------|--------------------|--------------------|--------------------|
|                  |       | 10% underreporting | 25% underreporting | 50% underreporting |
| Givry (1348)     | EP    | <b>1,288</b>       | <b>1,280</b>       | 1,395              |
|                  | PP    | 1,333              | 1,333              | <b>1,331</b>       |
|                  | RP    | <b>1,292</b>       | 1,370              | 1,439              |
| Florence (1400)  | EP    | <b>2,729</b>       | <b>2,876</b>       | <b>3,392</b>       |
|                  | PP    | 4,668              | 4,928              | 5,877              |
|                  | RP    | 10,568             | 11,264             | 12,752             |
| Barcelona (1490) | EP    | <b>1,942</b>       | <b>1,951</b>       | <b>2,121</b>       |
|                  | PP    | 2,418              | 2,453              | 2,610              |
|                  | RP    | 3,482              | 3,640              | 3,991              |
| London (1563)    | EP    | <b>1,582</b>       | <b>1,577</b>       | <b>1,575</b>       |
|                  | PP    | 4,630              | 4,629              | 4,629              |
|                  | RP    | 4,256              | 4,954              | 6,743              |
| Eyam (1666)      | EP    | <b>1,176</b>       | <b>1,175</b>       | <b>1,243</b>       |
|                  | PP    | <b>1,174</b>       | <b>1,174</b>       | <b>1,238</b>       |
|                  | RP    | 1,210              | 1,228              | 1,304              |
| Gdansk (1709)    | EP    | <b>825</b>         | <b>1,803</b>       | No convergence     |
|                  | PP    | 3,817              | 3,817              | <b>3,817</b>       |
|                  | RP    | 2,176              | 4,447              | No convergence     |
| Stockholm (1710) | EP    | <b>718</b>         | <b>709</b>         | <b>688</b>         |
|                  | PP    | 2,180              | 2,109              | 2,110              |
|                  | RP    | 1,238              | 1,612              | 2,759              |
| Moscow (1771)    | EP    | <b>3,916</b>       | <b>3,916</b>       | <b>3,931</b>       |
|                  | PP    | 6,790              | 6,790              | 6,790              |
|                  | RP    | 17,604             | 22,612             | No convergence     |
| Malta (1813)     | EP    | <b>2,760</b>       | <b>2,775</b>       | <b>2,864</b>       |
|                  | PP    | 3,653              | 3,850              | 4,244              |
|                  | RP    | 6,632              | 6,953              | 7,656              |

The models are designated as human ectoparasite (EP), primary pneumonic plague (PP), and rat and rat–flea (RP). Values in bold represent the best-fitting models that were within 10 points of the lowest BIC.
